Leslie C. Jameson, M.D., and Richard P. Dutton, M.D., M.B.A., CME Editors

## Instructions for Obtaining Continuing Medical Education (CME) Credit

ANESTHESIOLOGY's Journal CME is open to all readers. Members of the American Society of Anesthesiologists (ASA) enjoy a preferred rate for their subscription. However, Journal CME is not limited to ASA members or Journal subscribers. To take part in Journal CME, complete the following steps:

1. For the articles listed below, read the learning objectives and disclosure information.
2. Read the articles in the print or online edition.
3. Register at [www.asahq.org/journal-cme](http://www.asahq.org/journal-cme) and provide payment.
4. Once online, complete the questions and other required information for the CME program, including the evaluation.

The American Society of Anesthesiologists is accredited by the Accreditation Council for Continuing Medical Education to provide continuing medical education for physicians.

The American Society of Anesthesiologists designates this educational activity for a maximum of 1 *AMA PRA Category 1 Credit(s)*<sup>TM</sup>. Physicians should only claim credit commensurate with the extent of their participation in the activity.

**Purpose:** The focus of ANESTHESIOLOGY Journal CME is to educate readers on current developments in the science and clinical practice of anesthesiology.

**Target Audience:** ANESTHESIOLOGY Journal CME is designed for physicians involved with anesthesiology education, clinical practice, and research.

### Journal CME Planning Participants Disclosures

**Editor-in-Chief:** James C. Eisenach, M.D., receives research funding from King Pharmaceuticals.

**CME Editors:** Leslie C. Jameson, M.D., and Richard P. Dutton, M.D., M.B.A., have no relevant financial relationships to disclose.

**ASA Staff:** Employees involved in planning have no relevant financial relationships to disclose.

### Claiming Credit

All tests and requests for credit must be submitted through the ANESTHESIOLOGY CME website at [www.asahq.org/journal-cme](http://www.asahq.org/journal-cme). Participants should claim credit in 15-minute increments, for a maximum of 1 *AMA PRA Category 1 Credit(s)*<sup>TM</sup> per journal article.

Two payment options are available:

|            | ASA Member | Non-member |
|------------|------------|------------|
| Annual Fee | \$60       | \$120      |
| Per Issue  | \$10       | \$20       |

Payment may be made using Visa or MasterCard.

Please direct any questions about Journal CME to:  
Joyce Canselor  
Education Coordinator, CME  
(847) 268-9185  
[j.canselor@asahq.org](mailto:j.canselor@asahq.org)

### This Month's ANESTHESIOLOGY Journal CME

Read the article by Welch *et al.* entitled "Perioperative peripheral nerve injuries: A retrospective study of 380,680 cases during a 10-year period at a single institution" on page 490 and the accompanying editorial by Prielipp and Warner entitled "Perioperative nerve injury: A silent scream?" on page 464 of this issue.

### Learning Objective(s)

After completing this exercise, the learner will understand the use of databases to assess risk of a complication, know the most common characteristics of neuro-pathic injuries, and know the patient populations that are at greatest risk of injury.

### Author(s) Disclosures

**Authors:** Kevin K. Tremper, Ph.D., M.D., returned a disclosure form indicating that he received royalties and other material support from GE. Marnie B. Welch, M.D., Chad M. Brummett, M.D., Terrence D. Welch, M.D., Amy M. Shanks, M.S., Pankaj Guglani, M.D., and George A. Mashour, M.D., Ph.D., returned disclosure forms indicating that they have no financial interest in or affiliation with any commercial supporter or providers of any commercial services discussed in this educational material.

**Authors:** Richard C. Prielipp, M.D., and Mark A. Warner, M.D., returned disclosure forms indicating that they have no financial interest in or affiliation with any commercial supporter or providers of any commercial services discussed in this educational material.

### Expiration

Registration and submission of answers must be completed by September 30, 2012.
